# Supplementary material
Source: MDPI journal article supplement (https://www.mdpi.com/2073-445X/10/4/432)
Supplement: s1 [file s1]

## Appendix

# The Benefits of Combining Global and Local Data—A Showcase for Valuation and Mapping of Mangrove Climate Regulation and Food Provisioning Services within a Protected Area in Pará, North Brazil

## Appendix A

### Ecosystem service “Carbon stock for global climate regulation”

Species-specific average parameters of diameter at breast height (DBH), average height (H) and individuals per grid cell (Ind./Grid cell) for three different forest stands: *R. mangle*-dominated, *A. germinans*-dominated and *L. racemosa*-dominated [1]

Height values of the dominant species in a dominant stand were replaced by satellite based height data [2]

| Stands / variables                       | <i>R. mangle</i> -dominated                  | <i>A. germinans</i> -dominated               | <i>L. racemosa</i> -dominated                |
|------------------------------------------|----------------------------------------------|----------------------------------------------|----------------------------------------------|
| DBH <sub>Rz</sub> <sup>1</sup>           | 20.7 cm                                      | 7.0 cm                                       | No value                                     |
| H <sub>Rz</sub> <sup>2</sup>             | Variable, maximum tree height in a grid cell | 7.5 m                                        | No value                                     |
| Ind./Gridcell <sub>Rz</sub> <sup>3</sup> | 29.9                                         | 12.4                                         | No value                                     |
| DBH <sub>Av</sub> <sup>1</sup>           | 32.6 cm                                      | 11.8                                         | No value                                     |
| H <sub>Av</sub> <sup>2</sup>             | 14.8 m                                       | Variable, maximum tree height in a grid cell | No value                                     |
| Ind./Gridcell <sub>Av</sub> <sup>3</sup> | 5.1                                          | 148.2                                        | No value                                     |
| DBH <sub>La</sub> <sup>1</sup>           | 13.8 cm                                      | No value                                     | 13.1                                         |
| H <sub>La</sub> <sup>2</sup>             | 8.1 m                                        | No value                                     | Variable, maximum tree height in a grid cell |
| Ind./Gridcell <sub>La</sub> <sup>3</sup> | 3.0                                          | No value                                     | 4.5                                          |

<sup>1</sup>Average diameter at breast height, <sup>2</sup>Maximum height in a grid cell/average height, <sup>3</sup>Average individuals per grid cell, Rm=*R. mangle*, Av=*A. germinans*, La=*L. racemosa* [1–2]



## References

1. Mehlig, U.; Menezes, M.P.M.; Reise, A.; Schories, D.; Medina, E. Mangrove Vegetation of the Caeté Estuary. In Saint-Paul, U. and Schneider, H. (eds): *Mangrove Dynamics and Management in North Brazil*. Ecological Studies 2010, volume 211, pp. 71–107. Berlin Heidelberg: Springer-Verlag. DOI: 10.1007/978-3-642-13457-9\_6.
2. Simard, M.; Fatoyinbo, L.; Smetanka, C.; Rivera-monroy, V.H.; Castaneda-Moya, E.; Thomas, N.; Van der Stocken, T. Mangrove canopy height globally related to precipitation, temperature and cyclone frequency. *Nature Geoscience* 2019, 12 (12), pp. 40–45. DOI: 10.1038/s41561-018-0279-1.
